# Supplementary material
Source: publisher figshare collection journal article supplement (https://sage.figshare.com/ndownloader/files/15468584)
Supplement: Supplementary file 1 [file 15468584]

## Appendix 1:

### Semi-structured interview protocol

1. Introduce self and thank participant for involvement
2. Confirm completion of informed consent; retrieve documentation and ask if any questions
3. Ask to commence interview; record consent to audiotape prior to beginning. Introduce self as interviewer. Do not name or identify participant.
4. Ask for participant to share practice details: i) years in practice; ii) nature of practice (independent, chain, banner, grocery, franchise, etc). iii) describe typical day in practice; iv) education background (location, year graduated, degree(s), general description of education, reflections on professional socialization).
5. Ask for participant to share demographic details: i) age; ii) confirm gender identity; iii) home location (e.g. urban, suburban, rural)
6. Provide opportunity for participant to ask further questions before proceeding.
7. Ask about personal medical situation: suggested wording – “Thank you again for participating in this study. As you know, we are looking to understand the experiences of pharmacists who have become patients or caregivers. Would you like to share your experiences – as a patient, as a caregiver or as both? Please share only as much information as you feel comfortable. If you would like me to turn off the tape recorder at any time or if you’d like to pause and take a break, just let me know. Please, take your time.”
8. Clarification question: “May I ask you a question, just to clarify some details?”
9. At conclusion of stories/narratives, ask “What did you learn about yourself – as a person and as a pharmacist – from the stories you’ve shared with me today?”
10. Ask: “Is there anything else you’d like to share or discuss today?”
11. Thank participant, remind re: confidentiality provisions and anonymity of data, conclude.

Gregory P, Austin Z. Pharmacists’ lack of profession-hood: professional identity formation and its implications for practice. *Can Pharm J* (Ott) 2019;152(4). DOI: 10.1177/1715163519846534.
